# Modeling place cells and grid cells in multi-compartment environments: hippocampal-entorhinal loop as a multisensory integration circuit

Tianyi Li<sup>a</sup>, Angelo Arleo<sup>a</sup>, Denis Sheynikhovich<sup>a,\*</sup>

<sup>a</sup>*Sorbonne Université, INSERM, CNRS, Institut de la Vision, 17 rue Moreau, F-75012  
Paris, France*

---

## Abstract

Hippocampal place cells and entorhinal grid cells are thought to form a representation of space by integrating internal and external sensory cues. Experimental studies show that different subsets of place cells are controlled by vision, self-motion or a combination of both. Moreover, recent studies in environments with a high degree of visual aliasing suggest that a continuous interaction between place cells and grid cells can result in a deformation of hexagonal grids or in a progressive loss of visual cue control. The computational nature of such a bidirectional interaction remains unclear. In this work we present a neural network model of a dynamic loop between place cells and grid cells. The model is tested in two recent experimental paradigms involving double-room environments that provide conflicting evidence about visual cue control over self-motion-based spatial codes. Analysis of the model behavior in the two experiments suggests that the strength of hippocampal-entorhinal dynamical loop is the key parameter governing differential cue control in multi-compartment environments. Construction of spatial representations in visually identical environments requires weak visual cue control, while synaptic plasticity is regulated by the mismatch between visual- and self-motion representations. More gener-

---

\*I am corresponding author

*Email addresses:* [tianyi.li@inserm.fr](mailto:tianyi.li@inserm.fr) (Tianyi Li), [angelo.arleo@inserm.fr](mailto:angelo.arleo@inserm.fr) (Angelo Arleo), [denis.sheynikhovich@upmc.fr](mailto:denis.sheynikhovich@upmc.fr) (Denis Sheynikhovich)

ally our results suggest a functional segregation between plastic and dynamic processes in hippocampal processing.

*Keywords:* place cells, grid cells, multisensory combination, hippocampus, computational model, neural network

---

## 1 1. Introduction

2 It has long been accepted that spatial navigation depends crucially on a  
3 combination of visual and self-motion input (O'Keefe and Nadel, 1978). Since  
4 the seminal work of O'Keefe and Dostrovsky (1971), a neural locus of this com-  
5 bination is thought to be the place cell network in the CA1-CA3 subfields of the  
6 hippocampus proper (O'Keefe and Speakman, 1987, Muller and Kubie, 1987,  
7 Knierim et al., 1998, Jayakumar et al., 2018), with different subsets of place cells  
8 sensitive to self-motion cues, to visual cues or, more often, to a combination of  
9 them (Markus et al., 1994, Chen et al., 2013, Fattahi et al., 2018). A more  
10 recent discovery of grid cells in the medial entorhinal cortex led to the sugges-  
11 tion that the grid-cell network provides a self-motion-based representation of  
12 location that is combined with other sensory information on the level of place  
13 cells (Fyhn et al., 2004, McNaughton et al., 2006, Hayman and Jeffery, 2008,  
14 Cheng and Frank, 2011). The grid-cell representation is itself vision-dependent,  
15 since various properties of grid cells are affected by changes in visual features of  
16 the environment (Hafting et al., 2005, Krupic et al., 2015). Combined with the  
17 evidence showing that coherent changes in place-cell and grid-cell representa-  
18 tions occur during environment deformation and cue manipulation, these data  
19 suggest a bidirectional interaction between these representations at the neural  
20 level (Fyhn et al., 2007). While this bidirectional link is always present in nor-  
21 mal conditions, it may not be necessary for place cell activities, as shown in a  
22 number of lesion experiments (Sasaki et al., 2015, Schlesiger et al., 2018).

23 The nature of the dynamic interaction between visual and self-motion cues  
24 on the level of grid cells has recently been tested in two experiments: in a  
25 merged room, formed by removal of a wall separating two visually similar en-

26 vironments (Wernle et al., 2018), and during exploration of an environment  
27 consisting of two identical rooms connected by a corridor (Carpenter et al.,  
28 2015). Results of the first experiment have shown that firing patterns of grid  
29 cells were anchored by local sensory cues near environmental boundaries, while  
30 they underwent a continuous deformation far from the boundaries in the merged  
31 room, suggesting a strong control of local visual cues over grid-cell represen-  
32 tation (Wernle et al., 2018). Results of the second experiment indicated in  
33 contrast that during learning in a double-room environment grid cells progres-  
34 sively formed a global self-motion-based representation disregarding previously  
35 learned local cues (Carpenter et al., 2015).

36 Existing models of the entorhinal-hippocampal system are mostly based on  
37 the feed-forward input from grid cells to place cells, with an additional possi-  
38 bility to reset grid-field map upon the entry to a novel environment (Solstad  
39 et al., 2006, O’Keefe and Burgess, 2005, Blair et al., 2008, Sheynikhovich et al.,  
40 2009, Pilly and Grossberg, 2012), or focus on the feed-forward input from place  
41 cells to grid cells (Bonnievie et al., 2013). In addition to be at difficulty at  
42 explaining the above results on dynamic interactions between visual and self-  
43 motion cues, they are also not consistent with data showing that hippocampal  
44 spatial representations remain spatially tuned after MEC inactivation (Brun  
45 et al., 2008, Rueckemann et al., 2016) and that in pre-weanling rat pups, place  
46 fields can exist before the emergence of the grid cell network (Muessig et al.,  
47 2015). Moreover, disruption of grid cell spatial periodicity in adult rats does not  
48 alter preexisting place fields nor prevent the emergence of place fields in novel  
49 environments (Koenig et al., 2011, Brandon et al., 2014).

50 In this paper we propose a model of continuous dynamic loop-like interaction  
51 between grid cells and place cells, in which the main functional parameter is the  
52 feedback strength in the loop. We show that the model is able to explain the  
53 pattern of grid-cell adaptation in the two experiments by assuming a progressive  
54 decrease of visual control over self motion, and a plasticity mechanism regulated  
55 by allothetic and idiothetic cue mismatch over a long time scale.

## 56 2. Model

57 This section presents main neuronal populations in the model and their  
58 interactions. Further technical details and model parameters are given in the  
59 Appendix.

60 The rat is modeled by a panoramic visual camera that is moving in an envi-  
61 ronment along quasi-random trajectories resembling those of a real rat (Fig. 2A,  
62 top). The orientation of the camera corresponds to the head orientation of the  
63 model animal. The constant speed of the modeled rat is set to 10 cm/s, and  
64 sampling of sensory input occurs at frequency 10 Hz, roughly representing hip-  
65 pocampal theta update cycles. The modeled rat receives two types of sensory  
66 input (Fig. 1). First, self-motion input to the model is represented by angu-  
67 lar and translational movement velocities integrated by grid cells in the medial  
68 entorhinal cortex (mEC) to provide self-motion representation of location, as  
69 proposed earlier (McNaughton et al., 2006). Competitive self-organization of  
70 grid cell output occurs downstream from the entorhinal cortex in the dentate  
71 gyrus (DG) - CA3 circuit and gives rise to a self-motion-based representation  
72 of location, encoded by *motion-based place cells* (MPC). We did not include a  
73 specific neuronal population to model DG (de Almeida et al., 2009a). Instead,  
74 we implemented competitive learning directly on mEC inputs to CA3. Second,  
75 visual input is represented by responses of a two-dimensional retina-like grid  
76 of orientation-sensitive Gabor filters, applied to input camera images at each  
77 time step. For instance, in featureless rectangular rooms used in most of the  
78 simulations below, the only features present in the input images are the outlines  
79 of the environment walls (Fig. 2A, bottom). Importantly, the ‘retinal’ responses  
80 are assumed to be aligned with an allocentric directional frame further along  
81 the dorsal visual pathway (not modeled), the directional frame being set by  
82 head direction cells (Byrne et al., 2007, Sheynikhovich et al., 2009, Bicanski  
83 and Burgess, 2018). That is, visual input to the model at each spatial location  
84 is independent on the head direction that the model rat has upon arriving at  
85 that location. The visual input aligned with an allocentric directional frame is

86 assumed to be encoded in the inputs to the hippocampal formation from the  
87 lateral entorhinal cortex (IEC). Competitive self-organization of these inputs  
88 results in a purely vision-based representation of location, encoded by a pop-  
89 ulation of *visual place cells* (VPCs). Both MPCs and VPCs project to CA1  
90 cells that form a conjunctive representation of location in *conjunctive place cells*  
91 (CPCs). The principal novelty of the model is that CPCs in CA1 project back to  
92 the entorhinal grid cells and thus form a recurrent loop, reflecting the anatomy  
93 of entorhinal-hippocampal connections (Iijima et al., 1996).

#### 94 *Integration of visual and self-motion input by grid cells*

95 The self-motion input is processed by 5 identical neuronal populations rep-  
96 resenting distinct grid cell populations in the dorsal mEC (Hafting et al., 2005).  
97 Each grid cell population can be represented as a two-dimensional sheet of neu-  
98 rons equipped with attractor dynamics on a twisted-torus topology, as has been  
99 proposed in earlier models (Guanella et al., 2007, Sheynikhovich et al., 2009,  
100 Burak and Fiete, 2009). The position of an attractor state (or *activity packet*)  
101 in each grid cell population is updated based on the self-motion velocity vector.  
102 This is implemented by the modulation of recurrent connection weights between  
103 grid cells according to the model rat rotation and displacement, such that the  
104 activity bump moves across the neural sheet according to the rat movements  
105 in space (Guanella et al., 2007). The only difference between grid-cell popu-  
106 lations is that the speed of movement of the activity bumps across the neural  
107 sheet is specific for each population, resulting in population-specific distance  
108 between neighbouring grid fields and field size (Hafting et al., 2005). As long  
109 as each location in an environment corresponds to a distinct combination of  
110 positions of the activity packets, population activity of all grid cells encodes the  
111 current position of the animal in the environment (Burak and Fiete, 2009). The  
112 exact implementation of the attractor mechanism governing grid-cell network  
113 dynamics is not essential for the model to work.

114 In addition to the recurrent input from grid cells in the same population,  
115 each grid cell receives input from the CPC population which represent con-

116 junctive visual and self-motion representation (described in detail later), and  
 117 the relative strength of these two inputs is controlled by the parameter  $\alpha$ . At  
 118 a relatively high value of this parameter, grid-cell attractor dynamics in each  
 119 layer is strongly influenced by the hippocampal input, leading to an overall  
 120 stronger effect of visual information. At a low value of  $\alpha$ , the grid-cell dynamics  
 121 is governed almost exclusively by self-motion input.

122 Thus, the total synaptic input to a grid cell  $i$  at time  $t$  is (omitting grid cell  
 123 population index for clarity)

$$I_{gc}(t, i) = \alpha I_{gc}^{cpc}(t, i) + (1 - \alpha) I_{gc}^{gc}(t, i) \quad (1)$$

124 where the external input from CPC and recurrent inputs from other grid cells  
 125 are determined by

$$\begin{aligned} I_{gc}^{cpc}(t, i) &= \sum_{j=1}^{n_{cpc}} A_{cpc}(t-1, j) W_{gc}^{cpc}(t, i, j) \\ I_{gc}^{gc}(t, i) &= \sum_{k=1}^{n_{gc}} A_{gc}(t-1, k) W_{gc}^{gc}(t, i, k) \end{aligned} \quad (2)$$

126 Here,  $A_{cpc}(t, j)$  is the activity of  $j$ -th CPC at time  $t$  (described below) and  
 127  $A_{gc}(t, k) = I_{gc}(t, k)$  is the activity of  $k$ -th grid cell (we use linear activation  
 128 function for grid cells).

Feedforward synaptic connections from CPCs are initialized by random values and updated during learning according to a standard Hebbian learning scheme:

$$W_{gc}^{cpc}(t, i, j) = W_{gc}^{cpc}(t-1, i, j) + \eta_{gc}^{cpc} A_{gc}(t, i) A_{cpc}(t, j) \quad (3)$$

129 followed by explicit normalization ensuring that the norm of the synaptic weight  
 130 vector of each cell is unity (a neurally plausible implementation of the normal-  
 131 ization step can be implemented by a change in the learning rule (Oja, 1982)).

132 Recurrent synaptic connections between grid cells are constructed such as to  
 133 ensure attractor dynamics, modulated by velocity vector (Guanella et al., 2007).  
 134 More specifically, the connection weights between cells  $i$  and  $j$  is a Gaussian  
 135 function of the distance between these cells in the neural sheet. This connection

136 weight is modulated by the self-motion velocity vector, such that the activity  
137 bump moves across the neural sheet according to the direction and norm of  
138 the velocity vector, with a proportionality constant that is grid-cell population  
139 specific. These proportionality constants were tuned such that the grid spacing  
140 across different grid cell populations were between 42 cm and 172 cm. Grid-  
141 cell firing patterns were oriented  $7.5^\circ$  with respect to one of the walls of an  
142 experienced experimental enclosure (Krupic et al., 2015).

#### 143 *Encoding of visual and self-motion input by place cells*

144 As mentioned above, the model includes three distinct populations of place  
145 cells (Fig. 1). First, VPCs directly integrate allocentric visual inputs, presum-  
146 ably coming from IEC and project further to CA1. We putatively assign VPC  
147 population to CA3 where a competitive mechanism based on recurrent feedback  
148 can result in self-organization of visual inputs, the resulting spatial code further  
149 transmitted to CA1. The model of this pathway is based on the evidence that  
150 stable spatial representations were observed in CA1 after complete lesions of the  
151 mEC containing grid cells (Brandon et al., 2014, Schlesiger et al., 2018). Second,  
152 MPCs directly integrate input from grid cells and in the absence of visual inputs  
153 the activity of these cells represents purely self-motion-based representation of  
154 location. These cells represent CA3 place cells, acquiring their spatial selectivity  
155 via a competitive mechanism based on mEC inputs (de Almeida et al., 2009a).  
156 Third, CPCs that model CA1 pyramidal cells, combine visual and self-motion  
157 inputs coming from VPC and MPC populations, respectively. Crucially, CPCs  
158 project back to the grid cell populations, modeling anatomical projections from  
159 CA1 back to the entorhinal cortex forming a loop (Iijima et al., 1996, Slomianka  
160 et al., 2011) and controlled by the parameter  $\alpha$  as described above.

161 **Vision-based place cells.** VPCs acquire their spatial selectivity as a result  
162 of unsupervised competitive learning implemented directly on allocentric visual  
163 inputs, represented by Gabor filter activities aligned to an allocentric directional  
164 frame (see Appendix). As a result of learning, different cells become sensitive to  
165 constellations of visual features observed from different locations (independently

166 from head direction).

The total input to a VPC  $i$  at time  $t$  is given by

$$I_{vpc}^{avi}(t, i) = \sum_{j=1}^{n_{avi}} A_{avi}(t, j) W_{vpc}^{avi}(t, i, j) \quad (4)$$

167 where  $A_{avi}(t, j)$  is the activity of  $j$ -th Gabor filter aligned with the allocen-  
 168 tric directional frame. A E%-max winner-take-all learning scheme (de Almeida  
 169 et al., 2009a,b) is implemented, meaning that a small subset of maximally ac-  
 170 tive cells is selected (i.e. all cells whose total input is within  $E_{vpc}\%$  of the cell  
 171 with maximal input). The synaptic weight updates according to the Hebbian  
 172 modification rule (Eq. 3) are implemented only for the winner cells.

173 **Motion-based place cells.** MPCs read out grid cell activities similarly to  
 174 previously proposed models (Solstad et al., 2006, Sheynikhovich et al., 2009).  
 175 More specifically, they implement the E%-max winner-take-all learning scheme  
 176 identical to that of VPCs learning described above (with parameter  $E_{mpc}$  de-  
 177 termining the proportion of highly active cells).

**Conjunctive place cells.** Both VPCs and MPCs project to CPCs, that  
 model CA1 pyramidal cells sensitive to both visual and self-motion cues. The  
 total input to a conjunctive cell is:

$$I_{cpc}(t, i) = I_{cpc}^{vpc}(t, i) + I_{cpc}^{mpc}(t, i) \quad (5)$$

178 with

$$I_{cpc}^{vpc}(t, i) = \sum_{j=1}^{n_{vpc}} A_{vpc}(t-1, j) W_{cpc}^{vpc}(t, i, j) \quad (6)$$

$$I_{cpc}^{mpc}(t, i) = \sum_{k=1}^{n_{mpc}} A_{mpc}(t-1, k) W_{cpc}^{mpc}(t, i, k)$$

179 Again, a E%-max winner-take-all learning scheme is implemented in this net-  
 180 work, but with a heterosynaptic update learning rule:

$$W_{cpc}^{vpc}(t, i, j) = W_{cpc}^{vpc}(t-1, i, j) + \eta_{cpc}^{vpc} A_{cpc}(t, i) \mathcal{H}(A_{vpc}(t, j) - \theta) \quad (7)$$

$$W_{cpc}^{mpc}(t, i, j) = W_{cpc}^{mpc}(t-1, i, j) + \eta_{cpc}^{mpc} A_{cpc}(t, i) \mathcal{H}(A_{mpc}(t, j) - \theta)$$



181 where  $\mathcal{H}(\cdot)$  is the Heaviside step function ( $\mathcal{H}(x) = 0$  for  $x \leq 0$ , and  $\mathcal{H}(x) = x$   
182 otherwise) and  $\theta$  is the presynaptic activity threshold.

183 Due to the fact that MPCs, CPCs and grid cells are connected in a loop, a  
184 local activity packet in an “upstream” cell population shifts the activity packet  
185 in the “downstream” population towards the position of former. The size of  
186 the induced shift on each cycle of theta is determined by connection strengths  
187 between participating cells. In the absence of visual input, activity bumps in  
188 the three interconnected populations settle at the global stable state of the  
189 loop/attractor dynamics and hence all code for a single spatial location in the  
190 environment, which can be considered as the estimation of the animal’s location  
191 based on self-motion input. However, because of the visual input from VPCs,  
192 the loop dynamics is biased towards the visual position, encoded in the VPC  
193 population. Thus, the feedback strength in the loop determines the extent to  
194 which visual input influences place cell activities in the model.

### 195 **3. Results**

196 Since the early experiments testing the influence of visual and self-motion  
197 cues on place cell activity, it was clear that different subsets of place cells are  
198 controlled by these cues to different degrees, with some cells being controlled  
199 exclusively by one type of cue (Markus et al., 1994, Chen et al., 2013, Aronov  
200 and Tank, 2014, Fattahi et al., 2018). In the model we conceptualized these  
201 differences in VPC, MPC and CPC neural populations, representing purely  
202 vision-dependent, motion-dependent and multisensory place cells. Thus, when  
203 the model has learned place fields in a visually structured environment by mov-  
204 ing quasi-randomly around a rectangular box, VPCs have place fields only in  
205 a ‘light’ condition, i.e. when the visual cues are visible. This is true even  
206 if motion-based cues are absent (Fig. 2B, top row), as in a passive transport  
207 through a virtual maze (Chen et al., 2013). Conceptually, these cells represent  
208 the ability of hippocampal circuits to form self-organized representations of lo-  
209 cation even in the absence of grid-cell input from the mEC (Hales et al., 2014,

210 Brandon et al., 2014, Schlesiger et al., 2018). In contrast, MPCs will have place  
211 fields both in the light and dark conditions, but not during passive translation  
212 (Fig. 2B, middle row). Finally, CPCs will be active in all the three conditions  
213 since they combine both types of input (Fig. 2B, bottom row).

214 In contrast to VPCs that are completely independent of self-motion cues and  
215 encode stable visual features of the surrounding environment, MPCs and CPCs  
216 will be influenced by both visual and self-motion input, by virtue of their loop-  
217 like interactions through the grid cells. To test the relative influence of vision  
218 and self motion on the activity of these cells when the two types of cue provide  
219 conflicting sensory information, we decreased the gain of self-motion input to  
220 grid-cells while the model animal was crossing the environment from left to right  
221 (Fig. 2C). This decrease in gain was applied only to the horizontal component  
222 of motion, i.e. the horizontal component of the self-motion velocity vector was  
223 set to  $3/4$  of the baseline value. Such a modulation is similar to a change in the  
224 gain of ball rotation in a virtual corridor (Chen et al., 2013), but implemented  
225 in a two-dimensional environment instead of a linear track. The change in gain  
226 resulted in a shift of receptive fields of MPCs and CPCs to the right relative  
227 to their position in baseline conditions and the size of the shift is smaller than  
228 what would be predicted from purely self-motion integration (Figs. 2E,F).

229 To illustrate the loop dynamics in this simple example, consider the case  
230 when the model animal crosses the middle line of the environment moving from  
231 left to right (Fig. 2D). The integration of pure self-motion input over time would  
232 estimate the current position to be behind the visually estimated position due  
233 to the decrease in speed gain. This will cause a cell that normally fires at  
234 the center of the environment to shift its receptive field ahead of it. Thus,  
235 in the dark condition MPCs and CPCs have place fields shifted forward by  
236 an amount proportional to the gain factor, relative to their positions in the  
237 baseline condition (i.e. without the change in gain). However, in the light  
238 condition this self-motion-based estimation will be in conflict with visual cues  
239 that are not affected by changes in gain and represent the actual position in  
240 the environment. As a result of the dynamic loop-like interaction, at each

241 moment of time visual cues induce a forward shift of the activity packet in  
242 the grid-cell populations towards the visually identified location, the size of the  
243 shift being controlled by the parameter  $\alpha$ . Grid cells would similarly affect  
244 the MPCs, and then CPCs, closing the loop. Therefore, in the presence of  
245 conflicting cues receptive fields shift to an intermediate position between the  
246 self-motion and visual estimates (Figs. 2E,F). These results are reminiscent of  
247 those by Gothard et al. (1996), simulated in several earlier computational models  
248 (Samsonovich and McNaughton, 1997, Byrne et al., 2007, Sheynikhovich et al.,  
249 2009), and indeed the proposed mechanistic explanation is similar in this case.  
250 However, in the present model the parameter controlling the interaction between  
251 the visual and self-motion cues is cast in terms of the strength of the entorhinal-  
252 hippocampal loop.

253 To illustrate the same multisensory integration mechanism on the level of  
254 grid cells, we conducted another simulation in which the horizontal velocity gain  
255 was transiently decreased when the model animal crossed a specific portion of  
256 the environment (Fig. 3A). In this case of a transient cue conflict, grid patterns  
257 were locally deformed in that firing fields near the gain-decrease zone shifted to  
258 the right relative to control conditions, reflecting the sensory conflict (Figs. 3B-  
259 D). Near the borders of the environment, where the speed input was identical  
260 to the baseline conditions, grid pattern remained stable. The same effect on  
261 the level of the whole population of grid cells was quantified by the analysis of  
262 displacement vectors (Fig. 3C) and by sliding correlation maps (Fig. 3D), see  
263 Appendix and Wernle et al. (2018). These results suggest that local modifi-  
264 cations of grid patterns can be induced by conflicting sensory representations,  
265 similarly to what has been observed in a recent experiment by Wernle et al.  
266 (2018). As mentioned in the Introduction, these results are at odds with an  
267 earlier experiment (Carpenter et al., 2015) that studied adaptation of grid-cell  
268 patterns during construction of a spatial representation in an environment con-  
269 sisting in two identical rooms connected by a corridor. In the following sections  
270 we simulated the results of both experiments in an attempt to explain this con-  
271 flict and to understand neural mechanisms responsible for apparently different

272 patterns of grid-cell adaptation in the two experiments.

### 273 *3.1. Merged-room experiment*

274 Wernle et al. (2018) studied the integration between visual and self-motion  
275 cues by recording grid cells in two adjacent rectangular compartments initially  
276 separated by a wall. The two compartments were inserted in a bigger envi-  
277 ronment equipped with distal visual cues. The wall was subsequently removed  
278 and grid cells were recorded while the rat foraged in the merged environment.  
279 The authors observed that at the locations far from the removed wall grid cells  
280 conserved their firing patterns, while at the locations near those previously oc-  
281 cupied by the wall grid-cell firing fields shifted towards the removed wall so as to  
282 form a continuous quasi-hexagonal pattern. Results from the previous section  
283 suggest that the observed local deformation of the grid pattern can result from  
284 the local visual deformation caused by wall removal.

285 To verify that our model can reproduce these results, we recorded activities  
286 of simulated grid cells and place cells cells in experimental conditions similar  
287 to those in Wernle et al. More specifically, the model learned place fields in  
288 two virtual rooms separated by a wall (Fig. 4A). The two rooms were located  
289 inside a bigger room with distal visual cues (not shown), such that learned  
290 representations of the two rooms were different after initial exploration. After  
291 place fields were established, the wall was removed, the synaptic weights were  
292 fixed and neural activity was recorded. We observe that after wall removal, grid  
293 fields near distant walls remain fixed to the local cues, while near the former  
294 wall location they shift towards this location in the model, as in the experi-  
295 ment (Fig. 4B). The same phenomenon on the level of the whole population  
296 was quantified by the analysis of displacement vectors (Fig. 4C) and by sliding  
297 correlation (Fig. 5D).

298 Thus, the low-correlation band near the location of the removed wall is  
299 induced in the model by changes in visual input in the merged environment,  
300 which affect place coding via VPC activities. Local visual features at the loca-  
301 tions distant from the removed wall are similar in the corresponding locations

302 of the original environments A and B, since visual patterns formed by the clos-  
303 est walls and extramaze cues remain largely unchanged after the central wall  
304 removal. Therefore, VPCs activities at these locations during testing are very  
305 similar to those during training (Fig. 5A), leading to the same grid pattern at  
306 these locations. However, at the locations close to the removed wall, the com-  
307 bined effect of stable distal cues and modified proximal wall cues result in an  
308 extension of VPC receptive fields over the previous location of the removed wall.  
309 These changes in visual receptive fields induce local corrections of grid cell ac-  
310 tivity by shifting grid-cell activity packets towards the center, resulting in local  
311 deformations of grid-cell firing patterns similar to those observed during gain  
312 modification experiments. These deformations will in turn affect place fields  
313 of MPCs and CPCs, by shifting place fields of the cells near the removed wall  
314 towards it (Figs. 5B,C). These results suggest that local deformations of grid  
315 fields can result from the same correction mechanism as the one studied in the  
316 previous section, but in which local sensory conflict is induced by changes in  
317 the visual input instead of changes in self-motion gain.

318 Two principal neural processes affect the formation of spatial representa-  
319 tion in our model: while the acquisition of new spatial representations cru-  
320 cially depends on synaptic plasticity, the dynamic interaction between visual  
321 and self-motion cues is mediated by neuronal dynamics. We therefore tested  
322 the contribution of these two processes to the observed results. The influence of  
323 plasticity was assessed by letting the model learn during testing in the merged  
324 room, while that of neuronal dynamics was tested by progressively decreasing  
325 the strength of the loop (i.e. decreasing the control of vision over self-motion  
326 cues) in the absence of synaptic plasticity. The results of these manipulations  
327 can be summarized as follows. First, when learning was allowed during testing  
328 and the testing session in the merged room was sufficiently long, the particular  
329 correlation pattern (see Fig. 4C,D) was broken and a new representation was  
330 formed as a result of learning (Figs. 6A-C), unlike what was observed by Wernle  
331 et al. In particular, the newly formed global pattern was aligned with only one  
332 of the walls, resembling the results of Carpenter et al. (2015) addressed in the

333 following section. Moreover, learning of the new representation was faster when  
334 the control of visual cues (controlled by  $\alpha$ ) was low (not shown), since slower  
335 dynamics favors the learning of new connections between self-motion-based and  
336 visual representations. These results suggests that either the band-correlation  
337 pattern is a transient effect and should disappear with a longer exposure to the  
338 environment, or that learning of a new representation is inhibited in the merged  
339 room in real rats. Second, the decrease of  $\alpha$  across separate sessions resulted in  
340 widening of the low correlation band (Fig. 6D). This modification of the corre-  
341 lation pattern is explained by the fact that under a weak control of place fields  
342 by vision, it takes longer for the visual cues to correct self-motion.

### 343 *3.2. Double-room experiment.*

344 In the experiment of Carpenter et al. (2015), grid cells were recorded in rats  
345 during foraging in an experimental environment consisting of two rectangular  
346 rooms connected by a corridor (Fig. 7A, see Carpenter et al., 2015). The rooms  
347 were rendered as similar as possible in their visual appearance in order to favor  
348 visual aliasing. If local visual cues are the main determinant of grid cell activity,  
349 identical grid fields in the two environments were expected. In contrast, if self-  
350 motion cues are used to distinguish between the two rooms, grid cells should  
351 have distinct firing fields in the two environments. The results of this experi-  
352 ment revealed that both external and internal cues influence neuronal activity,  
353 but in a temporally-organized fashion. In particular, during early exploration  
354 sessions, grid cells had similar firing patterns in the two rooms, and this effect  
355 was maintained during the whole period of a session (tens of minutes). However,  
356 as the number of sessions (or days, as 1 session per day was run) increased, grid  
357 cells formed a global representation of the experimental environment, such that  
358 initial association between local cues and grid fields was progressively lost in  
359 one of the two rooms. These results are in apparent conflict with the data from  
360 the merged-room experiment considered earlier, since in that experiment local  
361 cues at the distant walls kept their control of nearby grid fields for up to 10  
362 daily sessions.

363       What could be the reason for the differences in learned grid-cell representa-  
364 tions in the two experiments? Suppose that, in the conditions of the double-  
365 room paradigm, the rat first enters room A, such that initial associations be-  
366 tween self-motion and visual cues are established in that room. The key question  
367 is whether or not a new representation for the subsequently entered room B will  
368 be formed, despite its identical visual appearance with room A (note that in  
369 the following we refer to any initially experienced room as room A, independ-  
370 dently on which actual room was visited first in the simulations). Results from  
371 the previous section suggest that a weaker control of visual cues combined with  
372 synaptic plasticity leads to the formation of a new representation. To verify this  
373 hypothesis, we run our model in the conditions of Carpenter et al. experiment,  
374 and we progressively (i.e. session by session) decreased the strength of the  
375 hippocampal-entorhinal feedback loop (without disabling synaptic plasticity).  
376 As the feedback strength controls the influence of visual input in our model, we  
377 expected that this procedure will result in the construction of a global represen-  
378 tation on the level of grid cells when the strength of the loop is sufficiently low.  
379 This was indeed the case as the global fit was high when the loop strength was  
380 set to low values (small  $\alpha$ ), and, conversely, the local fit was high for a strong  
381 loop (Figs. 7B,C, both of these measures were calculated in the same way as in  
382 the study by Carpenter et al., 2015, see also Appendix).

383       The local representation in early sessions is a consequence of the fact that  
384 only a representation of one room is learned, so that once the model rat enters  
385 the second room, grid-cells activities are quickly reset by vision to the represen-  
386 tation of the first (or, in terms of Skaggs and McNaughton (1998), the represen-  
387 tation of room A is “instantiated” upon the entry to the room B). In this case  
388 both MPCs and CPCs had identical firing fields in the two rooms (Fig. 8A).  
389 This was quantified in the model by computing the spatial correlation between  
390 place fields of each cell in the two rooms (correlation of 1 corresponds to iden-  
391 tical place fields). On the level of the whole population, the mean place-field  
392 correlation is high for a strong feedback loop (early sessions, large  $\alpha$ , Fig. 8B).  
393 The transition to a global representation in later sessions results from newly

394 formed synaptic associations between MPCs in CA3 (that are under a strong  
395 influence of self-motion input from grid cells), and CPCs in CA1 that are driven  
396 by vision. Synaptic plasticity at these connections is favored by a decreased  
397 hippocampal input to the EC, leading to a stronger reliance on self motion (late  
398 sessions, small  $\alpha$ , Fig. 8B). The development of such a new representation is  
399 reflected in lower place-field correlation on the level of MPCs and CPCs (late  
400 sessions, small  $\alpha$ , Fig. 8B). Note that purely vision-driven VPCs always have  
401 identical place fields in the two environments (not shown).

402 To summarize, the results of both the merged-room experiment of Wernle  
403 et al. (2018) and the double-room experiment of Carpenter et al. (2015) can be  
404 explained by the same model under two assumptions: First, synaptic plasticity  
405 is slow or inhibited when rats are placed into the merged room after learning  
406 in room A and B, but not when the rats are exposed to a stable double-room  
407 environment; Second, the control of visual cues progressively decreases in a fa-  
408 miliar environment in the course of daily sessions (this requirement is crucial  
409 to reproduce the result of the second experiment, but, according to our simula-  
410 tions, has only a weak effect in the first). What could be the explanation for the  
411 inhibition of learning in the merged-room, as opposed to continuous learning in  
412 the double-room experiment across daily sessions? Analysis of our model offers  
413 the following possible explanation: In early sessions of the double-room exper-  
414 iment, a large mismatch between visual (i.e. encoded in VPC activities) and  
415 self-motion (encoded by MPC activities) input occurs at the moment of entry  
416 to, or exit from, the room B, since the population activity of VPSs “jumps”  
417 to reflect the room A cues or the corridor cues, respectively. This jump of  
418 population activity can be quantified by the drop in correlation between the  
419 projections of VPCs and MPCs in CA3 onto the CPCs in CA1 near the room  
420 doors (Fig. 9A). In contrast, the mismatch is smaller for the merged-room ex-  
421 periment, since the visual and self-motion cues near the removed wall code for  
422 similar spatial positions (Fig. 9B). Therefore, it is possible that learning across  
423 sessions is regulated by the size of the mismatch between visual and self-motion  
424 cues. Note that statistical characterization of the mismatch in Fig. 9 required



425 averaging over many experimental runs and even in our idealized model can not  
426 be reliably detected online. This could be a possible reason why building of a  
427 global environment representation in Carpenter et al. experiment takes many  
428 days. We thus propose that CA1 area or, more likely, its output structures im-  
429 plement a mismatch detection process that can regulate hippocampal synaptic  
430 plasticity on the time scale of days (see below).

#### 431 **4. Discussion**

432 Our model is based on two main assumptions: that of a loop-like dynamics in  
433 the entorhinal-hippocampal network, and that of an independent visual place-  
434 cell representation formed on the basis of hippocampal inputs other than grid  
435 cells. Place cells in the CA1 area receive spatially organized inputs from grid  
436 cells via direct projections from mEC layer III and via perforant path projections  
437 from layer III via DG and CA3. Isolating direct feedforward mEC input to CA1  
438 only weakly affect place-sensitive activity in CA1 suggesting that mEC inputs  
439 are sufficient for the establishment of representation in this area (Brun et al.,  
440 2002). Isolating only indirect projections resulted in noisier CA1 place fields  
441 that formed although relatively impaired but still stable spatial representations  
442 (Brun et al., 2008). These results suggest a complementary role of both the  
443 direct and indirect pathways for spatial coding in the CA1. Place cells in CA1  
444 project back to the entorhinal cortex both directly and via subiculum (Naber  
445 et al., 2001, Kloosterman et al., 2003, Slomianka et al., 2011) and hippocampal  
446 input is necessary for grid cell activity (Bonnievie et al., 2013), supporting the  
447 loop-like structure of entorhinal-hippocampal interactions (Iijima et al., 1996).

448 That a subset of hippocampal place cells can form spatial representations  
449 independently from grid cells is supported by the evidence showing that place  
450 fields can exist before the emergence of the grid cell network in rat pups (Mues-  
451 sig et al., 2015) and that the disruption of grid cell activity in adult rats does  
452 not prevent the emergence of place fields in novel environments (Brandon et al.,  
453 2014). These grid-cell independent place fields retain all principal properties

454 of a self-organized representation in control animals: it can be learned in new  
455 environments, it is stable over time, and independent maps are established in  
456 different rooms (Rueckemann et al., 2016, Schlesiger et al., 2018). These data  
457 suggest that some place cells rely mostly on grid-cell input, likely representing  
458 self-motion-based spatial signals, while other place cells preferentially use other  
459 sensory information to form spatial representation in a self-organized manner.  
460 This separation of place cells depending on their principal source of sensory input  
461 is also supported by observations showing that in virtual environment subsets of  
462 place cells are differentially responsive to sensory manipulations: during passive  
463 movement 25% of cells keep their firing fields unchanged; 20% of cells do change  
464 their firing patterns when all visual cues are turned off; most of the cells are  
465 modified to various degrees by cue manipulations (Chen et al., 2013), see also  
466 Markus et al. (1994). Moreover, recent evidence suggests that CA1 cells respon-  
467 sive to visual and self-motion input are anatomically separated: place cells more  
468 responsive to self-motion cues are located predominantly in superficial layers of  
469 CA1, while those more responsive to visual cues are found in deep layers (Fat-  
470 tahi et al., 2018), see also Mizuseki et al. (2011). It was also recently shown that  
471 CA1 cells in deep and superficial layers receive stronger excitation from mEC  
472 and IEC, respectively, with the amount of excitation being also dependent on  
473 the position of the neurons along the longitudinal hippocampal axis (Masurkar  
474 et al., 2017). These data further support the existence of functionally differ-  
475 ent subsets of place cells in CA1, that can either be inherited from similarly  
476 segregated cells in CA3 or to be formed directly from IEC inputs to CA1.

477 Our model is constructed to reflect the above data in a simplified way. While  
478 the neural basis for the aforementioned grid-cell-independent code is not clear,  
479 we conceptualized it by a population of VPCs, which learn subsets of visual fea-  
480 tures corresponding to a particular location using simple competitive learning  
481 scheme. Similarly to experimental data described above, VPCs form a sta-  
482 ble and independent code for different environments as long as visual cues in  
483 these environments are stable. It is likely that such a code is formed inside the  
484 hippocampus itself based on the inputs either from parietal-cingulate network

485 (Byrne et al., 2007, Bicanski and Burgess, 2018), or from IEC input (Schlesiger  
486 et al., 2018), since no location-sensitive code was observed directly upstream  
487 of the hippocampus (but see Mao et al., 2017). While in its current version  
488 our model assumes that VPCs are learned in CA3 and transmitted to CA1, the  
489 model can be modified to implement competitive learning in CA1 directly on vi-  
490 sual inputs from IEC, bypassing CA3. Our self-motion based code in GC-MPC  
491 populations is based on internal attractor dynamics and does not in principle  
492 require place-cell input, contrary to experimental data (Bonnievie et al., 2013).  
493 However, this dependence can be included in the model by adding strong inhi-  
494 bition to the grid cell layer, such that a nonspecific excitatory drive from CA1  
495 were required for grid-cell activities (Bonnievie et al., 2013). Such a modification  
496 of the model will not significantly change any of the present results.

497 Main conclusions from our modeling results are twofold. First, the con-  
498 struction of a global representation in the double-room experiment requires a  
499 diminished control of visual cues over path integration, translated in the model  
500 by decreasing the strength of the hippocampal input to the EC. By slowing  
501 down the dynamical correction of GCs and MPCs by vision, it allows synaptic  
502 plasticity to form new associations between visual representations (encoded in  
503 VPC activity) and CA3-mediated representations at the level of CA1, and to  
504 disambiguate the two rooms. Thus, in our model, synaptic plasticity at CA3-  
505 CA1 synapses is crucial for the formation of new representations in visually  
506 identical environments. Ultimately, the construction of this representation is  
507 determined by relative time scales of two processes: *(i)* correction of path inte-  
508 gration by visual cues using network dynamics, and *(ii)* synaptic plasticity at  
509 Schaffer collaterals. Second, the fact that rats learn a global representation in  
510 the double-room, but not in the merged-room experiment is explained in the  
511 model by a strongly reduced or inhibited synaptic plasticity in the latter case.  
512 Indeed, under the hypothesis that grid cells express hexagonal patterns as a  
513 consequence of attractor dynamics with circular weight matrices (McNaughton  
514 et al., 2006), translocation of grid fields at the center of the environment must  
515 result from dynamic correction mechanisms, since synaptic plasticity between

516 place-cell and grid-cell networks will necessarily lead to the emergence of a co-  
517 herent (global) grid-cell representation. If this explanation is correct, then what  
518 could be the mechanism that regulate synaptic plasticity differently in the two  
519 cases? One possibility suggested by the analysis of the model is that such a  
520 regulation mechanism can act on the basis of a mismatch between visual and  
521 self-motion representations. On the level of population activity, a high degree of  
522 mismatch corresponds to incoherent "jumps" of visual representation caused by  
523 visual aliasing, relative to the representation formed by path integration. While  
524 these jumps are reflected in the distribution of synaptic inputs to modeled CA1  
525 cells in our model (Fig. 9), the fact that learning of a global representation in  
526 real animals takes many days (Carpenter et al., 2015) suggests that detection  
527 of this mismatch may involve memory consolidation mechanisms (Skaggs and  
528 McNaughton, 1996, Girardeau et al., 2009, Benchenane et al., 2010).

529 A number of experiments studied place fields dynamics in environments  
530 consisting of two or more visually identical compartments (Skaggs and Mc-  
531 Naughton, 1998, Tanila, 1999, Fuhs et al., 2005, Paz-Villagrán et al., 2006,  
532 Spiers et al., 2015, Grieves et al., 2016). The objective of these experiments  
533 was to check whether path integration can be used to distinguish between com-  
534 partments and to assess the extent to which visual cues control path integration  
535 information. Earlier experiments provided evidence for a partial (Skaggs and  
536 McNaughton, 1998) or a nearly complete (Tanila, 1999) remapping when rats  
537 travelled between two similarly looking compartments, suggesting that path in-  
538 tegration can be used to distinguish between them. A major difference between  
539 experimental setups in these latter experiments was that the two compartments  
540 in Skaggs and McNaughton (1998) were oriented in the same way, whereas in  
541 Tanila (1999) there was a  $180^\circ$  difference in their orientation. A follow-up ex-  
542 periment (Fuhs et al., 2005) has demonstrated a key role of angular, but not  
543 linear, path integration in complete remapping observed by Tanila et al. 1999.  
544 However, Fuhs et al. did not observe partial remapping in conditions very simi-  
545 lar to those of Skaggs and McNaughton (1998), as most cells had identical place  
546 fields in the two compartments. More recent experiments with multiple visually

547 identical compartments confirmed the importance of angular path integration  
548 for remapping (Spiers et al., 2015, Grieves et al., 2016, see also Paz-Villagrán et  
549 al., 2006), and suggested that a long amount of time (about 2-3 weeks) is nec-  
550 essary to build separate representations for visually identical rooms connected  
551 by a corridor (Carpenter et al., 2015).

552 In our simulations, we assumed that the animals head direction system pro-  
553 vides a correct orientation information (i.e. relative to an arbitrary fixed refer-  
554 ence orientation) at any moment in time, and so the visual input to the model is  
555 always aligned to the common directional frame in all environments (in the ex-  
556 periment of Carpenter et al. a common directional frame could be provided by  
557 the corridor cues, whereas it was provided by distal extramaze cues in Wernle  
558 et al. experiment). As a result of competitive learning, synapses to a visual  
559 place cell learn visual cues observed at a location where this cell was recruited.  
560 Therefore, a place is visually “recognized” (i.e. visual place cells strongly fire) if  
561 the previously learned visual cues are observed in the same allocentric direction  
562 (independently of any path integration signal). If, however, the same visual cues  
563 are observed at a very different orientation (e.g. is a room is rotated  $180^\circ$ ) visual  
564 place cells will not be activated (unless visual cues are rotationally symmetric),  
565 and new cells will be recruited to represent this environment, in agreement with  
566 Fuhs et al. (2015) study. At smaller rotation angles, the model predicts that  
567 place cells will be activated to a higher degree, depending on the autocorre-  
568 lation width of the learned visual snapshots (Grieves et al., 2016). That the  
569 head direction system can maintain a fixed orientation in the presence of visual  
570 cue rotation is supported by experimental evidence (Jacob et al., 2017, see also  
571 Paz-Villagrán et al., 2006).

572 The ability (or inability) of the hippocampal representations to express par-  
573 tial remapping has been discussed in view of the multichart model (McNaughton  
574 et al., 1996, Samsonovich and McNaughton, 1997). This model predicted that  
575 if rats could learn room identities despite their similar visual appearance, place-  
576 field representations of the two rooms would be orthogonal (different charts are  
577 active in different rooms), whereas they would be identical in the opposite case

578 (the same chart is active in both rooms). Partial remapping observed by Skaggs  
579 and McNaughton (1998) contradicted this hypothesis, as some cells had identi-  
580 cal fields in the two rooms, while other cells had different place fields, suggesting  
581 that two charts could be active at the same time. In similar conditions Fuhs  
582 et al. (2005) observed no partial remapping for unclear reasons, but suggested  
583 that the map of one compartment was somehow “extended” to the second one,  
584 instead of loading a new map. Our results contribute to this question in two  
585 ways. First, we argued that a learning of new representation is under control of  
586 a putative neural mismatch detection mechanism. In the experimental condi-  
587 tions of the two above studies, the largest amount of mismatch occurs upon the  
588 door crossing, and so the number of door crossings experienced by the rat may  
589 be an important parameter with respect to learning. While in Skaggs and Mc-  
590 Naughton (1998) the rats were freely moving between the compartments during  
591 a trial, in Fuhs et al. (2005) the number of transitions between rooms was lim-  
592 ited to 2 per trial, potentially affecting the results. Second, our results provide  
593 a neuronal mechanism for the map observed map extension, i.e. progressive  
594 learning of a global representation.

595 Our results lead to a number of testable predictions. First, VPC in the  
596 model acquire representation of only one compartment (among two or more  
597 identically looking ones). We thus predict that a subset of place cells, that do  
598 not rely on self-motion signals (e.g. such as those observed in Chen et al., 2013)  
599 and potentially located in the deep sublayer of CA1 pyramidal layer (Fattahi  
600 et al., 2018), will persist through learning and will have repetitive place fields  
601 even when a global representation has been learned. Second, learning of separate  
602 neuronal representations of different compartments (i.e. progressive remapping)  
603 will require the formation of new associations between CA3 cells and CA1  
604 cells preferentially from the superficial sublayer of pyramidal cells. Third, place  
605 cells that will remap first should have place fields close to the door, since for these  
606 cells the difference between visual and motion-based inputs is largest. Finally,  
607 as the width of the low-correlation band (Fig. 6D) is proposed to be related  
608 to the strength of the visual cue control over path integration, it is predicted

609 that stronger reliance on path integration will result in a wider band. This  
610 might occur for example in aged animals, in which a stronger reliance on path  
611 integration (or, conversely, an weaker control by visual cues) has been observed  
612 (Tanila, 1999, Rosenzweig et al., 2003).

### 613 **Acknowledgements**

614 Funding: This research was supported by ANR – Essilor SilverSight Chair  
615 ANR-14-CHIN-0001.

### 616 **Appendix**

#### 617 *Visual input*

618 The artificial retina was modeled as a rectangular grid of Gabor filters uni-  
619 formly covering the panoramic cylindrical camera with visual field  $160^\circ \times 360^\circ$ .  
620 At each location of the grid, 4 filters of different orientations were used. We  
621 used two spatial frequencies for all the filters (180 Hz, 72 Hz) chosen so as to  
622 detect visual features of simulated environments. Activities of all Gabor filters  
623 were computed by the convolution with the input visual image at each time  
624 step. Filter activities were then aligned with a common allocentric directional  
625 frame, such that if the model rat rotated without changing its spatial position,  
626 the activities of aligned filters would stay constant.

#### 627 *Virtual environments*

628 Virtual environments for the three simulations presented in this paper were  
629 developed with Unity ([www.unity3d.com](http://www.unity3d.com)). In Simulation 1 (Figs. 2 and 3) the  
630 environment was a rectangular room  $2 \times 1$  m with featureless gray walls. In  
631 Simulation 2 (Figs. 4-6), the experimental room was modeled as a square arena  
632  $2 \times 2$  m. During training, it was separated into two rooms by a wall at the  
633 center of the environment. The experimental arena was located inside a bigger  
634 environment ( $4 \times 4$  m) with four salient visual cues (large circles) on each wall.  
635 In Simulation 3 (Figs. 7-8), the environment consisted of two identical rooms  
636  $1 \times 1$  m connected by a corridor ( $0.5 \times 2$  m).

637 *Simulation details*

638 In all three simulations, VPCs were learned from the simulation environment  
639 before the training of the place cells and grid cells. Model parameters are listed  
640 in Table 1.

| Parameter                                                              | Value                                                    |
|------------------------------------------------------------------------|----------------------------------------------------------|
| $\alpha$                                                               | 0.03 (Sim. 1), decreasing from 0.04 to 0.005 (Sim. 2, 3) |
| $\eta_{vpc}^{avi}$                                                     | 0.01                                                     |
| $\eta_{cpc}^{vpc}, \eta_{cpc}^{mpc}, \eta_{gc}^{cpc}, \eta_{mpc}^{gc}$ | 0.0025                                                   |
| $E_{vpc}$                                                              | 15%                                                      |
| $E_{mpc}$                                                              | 20%                                                      |
| $E_{cpc}$                                                              | 30%                                                      |
| $\theta$                                                               | 0.75                                                     |

Table 1: Parameters of the model.

641 *Simulation 1*

642 *Training.* The model was trained for about 25 minutes (15000 time steps)  
643 by moving quasi-randomly in the experimental room.

644 *Testing.* Synaptic weights were fixed, and activities of all the cells in the  
645 model were recorded in the following three experimental conditions. In the  
646 ‘light’ condition the full model was run to randomly explore the environment.  
647 In the ‘passive translation’ condition, the velocity vector input to the grid cell  
648 populations was set to (0,0). In the ‘dark’ condition, the model was run with  
649 visual cues turned off (uniform gray images were presented as visual input).  
650 Next, the trained model was run to cross the environment from left to right in  
651 ‘light’ and ‘dark’ conditions as before, but with the speed gain in the grid cell  
652 populations modulated as described in the Results.

653 *Simulation 2*

654 *Training.* The model was trained separately in rooms A and B for 30 min-  
655 utes, and synaptic weight were fixed to the learned values.



656 *Testing.* In the main experiment, neural activities were recorded while the  
657 model rat randomly explored the merged room for 1 h. In the experiment testing  
658 the influence of plasticity, synaptic weights were updated while the model rat  
659 additionally explored the merged room for 1h. In the experiment testing the  
660 influence of the strength of the feedback loop, the model rat was run in the  
661 merged room for 20 trials per each value of  $\alpha$ , ranging from 0.005 to 0.04. To  
662 average data, 4 testing trials were run in each condition.

663 *Sliding correlation.* The sliding correlation heat maps for grid-cell firing  
664 patterns were calculated as described in Wernle et al. (2018). The size of the  
665 sliding correlation window was defined based on the grid spacing of the cell.  
666 The window moved from the top left to the bottom right corner in the grid field  
667 maps of the environment A|B (i.e. before the wall removal) and AB (i.e. after  
668 the wall removal). At each window location, the portion of the grid maps in  
669 the environments A|B and AB, outlined by the sliding window, were correlated  
670 with each other.

671 *Displacement vector analysis.* Displacement vectors were calculated as de-  
672 scribed in Wernle et al. (2018). To obtain a displacement vector for one grid cell,  
673 the experimental environment was divided into  $4 \times 4$  blocks ( $50 \times 50$  cm each).  
674 In each block, the vector corresponding to the shift of grid fields in the environ-  
675 ment AB relative to that in the environment A|B was calculated. The vectors  
676 were sorted into the corresponding blocks based on the grid field location in  
677 the training environment and the mean over all vectors was computed. To an-  
678 alyze displacement vector lengths, the environment was divided into  $8 \times 8$  bins.  
679 The vectors were then sorted into the corresponding bins based on the original  
680 grid field location in the training environment, and the mean vector length was  
681 computed.

### 682 *Simulation 3*

683 *Training.* At the beginning of each training session, the model was placed  
684 into the center of the corridor and then explored the complete environment  
685 quasi-randomly for 1 h. In subsequent training sessions, the strength of the

686 feedback loop  $\alpha$  decreased from 0.04 (first session) to 0.005 (last session) with  
687 step 0.005.

688 *Testing.* After each training session, the weights were fixed and neural activ-  
689 ity was recorded. In order to average the results, the experiment was repeated  
690 20 times for each value of  $\alpha$ .

*Global and local fits.* The firing rate maps of modeled grid cells were fit with  
ideal local and global grid patterns using the procedure described in Carpenter  
et al. (2015). First, grid spacing was identified by correlating the firing pattern  
with 30 ideal firing grids. Each ideal grid pattern is a product of three cosine  
gratings

$$f(\vec{x}) = A[1 + \cos(k_1(\vec{x} + \vec{c}))][1 + \cos(k_2(\vec{x} + \vec{c}))][1 + \cos(k_3(\vec{x} + \vec{c}))]$$

691 with peak firing rate  $A$ , wave vectors  $\vec{k}_1$ ,  $\vec{k}_2$  and  $\vec{k}_3$  and phase offsets  $\vec{c} = (c_x, c_y)$ .  
692 The wave vectors are defined as  $\vec{k} = (\frac{2\pi}{\lambda} \cos(\varphi), \frac{2\pi}{\lambda} \sin(\varphi))$ , where  $\lambda = \frac{\sqrt{3}}{2}G$  is  
693 the grating wave length,  $G$  is the grid spacing and  $\varphi$  is the grid orientation. The  
694 30 ideal grid patterns were created with grid spacing evenly distributed between  
695 30 and 170 cm. Since the grid orientation in the model is set to  $7.5^\circ$ ,  $\varphi$  in the  
696 three wave vectors is equal to  $7.5^\circ$ ,  $127.5^\circ$  and  $247.5^\circ$ , respectively. Spatial  
697 cross-correlograms were computed between the recorded firing rate map and  
698 the ideal grid patterns over a range of spatial phase offsets. The grid spacing of  
699 the recorded firing pattern is then set to that of the ideal grid pattern with the  
700 highest correlation. Second, a local and global fit with the identified grid spacing  
701 was computed for the recorded firing rate map. The local fit was performed using  
702 two grid patterns (one per room) with the same phase offset. The global fit was  
703 performed using only one grid pattern with continuous phase across the two  
704 rooms. The Pearson product-moment correlation between the recorded firing  
705 rate map and the local and global grid patterns were computed over a range  
706 of phase offsets. The highest correlation with the local and global model was  
707 identified as the value of local and global fit, respectively.

708 **References**

709 J. O'Keefe, L. Nadel, *The hippocampus as a cognitive map*, Clarendon Press,  
710 Oxford, ISBN 0198572069, 1978.

711 J. O'Keefe, J. Dostrovsky, *The hippocampus as a spatial map. Preliminary*  
712 *evidence from unit activity in the freely-moving rat*, *Brain Res.* 34 (1971)  
713 171–175.

714 J. O'Keefe, A. Speakman, *Single unit activity in the rat hippocampus during a*  
715 *spatial memory task*, *Exp. Brain Res.* 68 (1987) 1–27.

716 R. U. Muller, J. L. Kubie, *The effects of changes in the environment on the*  
717 *spatial firing of hippocampal complex-spike cells*, *J. Neurosci.* 7 (7) (1987)  
718 1951–1968, ISSN 0270-6474.

719 J. J. Knierim, H. S. Kudrimoti, B. L. McNaughton, *Interactions between id-*  
720 *iothetic cues and external landmarks in the control of place cells and head*  
721 *direction cells.*, *J. Neurophysiol.* 80 (1) (1998) 425–46.

722 R. P. Jayakumar, M. S. Madhav, F. Savelli, H. T. Blair, N. J. Cowan, J. J.  
723 Knierim, *Recalibration of path integration in hippocampal place cells*, *bioRxiv*  
724 (2018) 319269doi:10.1101/319269.

725 E. J. Markus, C. A. Barnes, B. L. McNaughton, V. L. Gladden, W. E. Skaggs,  
726 *Spatial information content and reliability of hippocampal CA1 neurons: Ef-*  
727 *fects of visual input*, *Hippocampus* 4 (4) (1994) 410–421, ISSN 1050-9631,  
728 doi:10.1002/hipo.450040404.

729 G. Chen, J. A. King, N. Burgess, J. O'Keefe, *How vision and movement combine*  
730 *in the hippocampal place code.*, *Proc. Natl. Acad. Sci. U. S. A.* 110 (1) (2013)  
731 378–383, ISSN 1091-6490, doi:10.1073/pnas.1215834110.

732 M. Fattahi, F. Sharif, T. Geiller, S. Royer, *Differential Representa-*  
733 *tion of Landmark and Self-Motion Information along the CA1 Ra-*  
734 *dial Axis: Self-Motion Generated Place Fields Shift toward Land-*

- 735 marks during Septal Inactivation, *J. Neurosci.* 38 (30) (2018) 6766–  
736 6778, ISSN 0270-6474, doi:10.1523/JNEUROSCI.3211-17.2018, URL  
737 <http://www.jneurosci.org/lookup/doi/10.1523/JNEUROSCI.3211-17.2018>.
- 738 M. Fyhn, S. Molden, M. P. Witter, E. I. Moser, M. B. Moser, Spatial represen-  
739 tation in the entorhinal cortex., *Science* (80-. ). 305 (2004) 1258–1264.
- 740 B. L. McNaughton, F. P. Battaglia, O. Jensen, E. I. Moser, M. B. Moser, Path  
741 integration and the neural basis of the 'cognitive map', *Nat. Rev. Neurosci.*  
742 7 (8) (2006) 663–678.
- 743 R. M. Hayman, K. J. Jeffery, How heterogeneous place cell responding  
744 arises from homogeneous grids-A contextual gating hypothesis, *Hippocam-*  
745 *pus* 18 (12) (2008) 1301–1313, ISSN 10509631, doi:10.1002/hipo.20513.
- 746 S. Cheng, L. Frank, The structure of networks that produce the transformation  
747 from grid cells to place cells, *Neuroscience* 197 (2011) 293–306, ISSN 0306-  
748 4522, doi:10.1016/J.NEUROSCIENCE.2011.09.002.
- 749 T. Hafting, M. Fyhn, S. Molden, M. B. Moser, E. I. Moser, Microstructure of a  
750 spatial map in the entorhinal cortex., *Nature* 436 (2005) 801–806.
- 751 J. Krupic, M. Bauza, S. Burton, C. Barry, J. O'Keefe, Grid cell symmetry is  
752 shaped by environmental geometry, *Nature* 518 (7538) (2015) 232–235, ISSN  
753 0028-0836, doi:10.1038/nature14153.
- 754 M. Fyhn, T. Hafting, A. Treves, M.-B. Moser, E. I. Moser, Hippocampal remap-  
755 ping and grid realignment in entorhinal cortex., *Nature* 446 (7132) (2007)  
756 190–4, ISSN 1476-4687, doi:10.1038/nature05601.
- 757 T. Sasaki, S. Leutgeb, J. K. Leutgeb, Spatial and memory circuits in the medial  
758 entorhinal cortex, *Curr. Opin. Neurobiol.* 32 (2015) 16–23, ISSN 18736882,  
759 doi:10.1016/j.conb.2014.10.008.
- 760 M. I. Schlesiger, B. L. Boubilil, J. B. Hales, J. K. Leutgeb, S. Leut-  
761 geb, Hippocampal Global Remapping Can Occur without Input

- 762 from the Medial Entorhinal Cortex, *Cell Rep.* 22 (12) (2018)  
763 3152–3159, ISSN 22111247, doi:10.1016/j.celrep.2018.02.082, URL  
764 <https://linkinghub.elsevier.com/retrieve/pii/S2211124718302924>.
- 765 T. Wernle, T. Waaga, M. Mørreaunet, A. Treves, M. B. Moser, E. I. Moser,  
766 Integration of grid maps in merged environments, *Nat. Neurosci.* 21 (1) (2018)  
767 92–105, ISSN 15461726, doi:10.1038/s41593-017-0036-6.
- 768 F. Carpenter, D. Manson, K. Jeffery, N. Burgess, C. Barry, Grid Cells Form a  
769 Global Representation of Connected Environments, *Curr. Biol.* 25 (9) (2015)  
770 1176–1182, ISSN 09609822, doi:10.1016/j.cub.2015.02.037.
- 771 T. Solstad, E. I. Moser, G. T. Einevoll, From grid cells to place cells: A math-  
772 ematical model, *Hippocampus* 16 (12) (2006) 1026–1031.
- 773 J. O’Keefe, N. Burgess, Dual phase and rate coding in hippocampal place cells:  
774 Theoretical significance and relationship to entorhinal grid cells, *Hippocam-*  
775 *pus* 15 (7) (2005) 853–866, ISSN 10509631, doi:10.1002/hipo.20115.
- 776 H. T. Blair, K. Gupta, K. Zhang, Conversion of a phase- to a rate-coded position  
777 signal by a three-stage model of theta cells, grid cells, and place cells, *Hip-*  
778 *pocampus* 18 (12) (2008) 1239–1255, ISSN 10509631, doi:10.1002/hipo.20509.
- 779 D. Sheynikhovich, R. Chavarriaga, T. Strösslin, A. Arleo, W. Gerstner,  
780 T. Strosslin, A. Arleo, W. Gerstner, Is there a geometric module for spa-  
781 tial orientation? Insights from a rodent navigation model., *Psychol. Rev.*  
782 116 (3) (2009) 540–566, ISSN 0033295X, doi:10.1037/a0016170.
- 783 P. K. Pilly, S. Grossberg, How Do Spatial Learning and Memory Occur in the  
784 Brain? Coordinated Learning of Entorhinal Grid Cells and Hippocampal  
785 Place Cells, *J. Cogn. Neurosci.* 24 (5) (2012) 1031–1054, ISSN 0898-929X.
- 786 T. Bonnevie, B. Dunn, M. Fyhn, T. Hafting, D. Derdikman, J. L. Kubie,  
787 Y. Roudi, E. I. Moser, M.-B. Moser, Grid cells require excitatory drive from  
788 the hippocampus, *Nat. Neurosci.* 16 (3) (2013) 309–317, ISSN 1097-6256,  
789 doi:10.1038/nn.3311, URL <http://www.nature.com/articles/nn.3311>.

- 790 V. H. Brun, S. Leutgeb, H.-Q. Wu, R. Schwarcz, M. P. Witter, E. I. Moser,  
791 M.-B. Moser, Impaired Spatial Representation in CA1 after Lesion of Direct  
792 Input from Entorhinal Cortex, *Neuron* 57 (2) (2008) 290–302, ISSN 0896-  
793 6273, doi:10.1016/j.neuron.2007.11.034.
- 794 J. W. Rueckemann, A. J. DiMauro, L. M. Rangel, X. Han, E. S. Boyden,  
795 H. Eichenbaum, Transient optogenetic inactivation of the medial entorhi-  
796 nal cortex biases the active population of hippocampal neurons, *Hippocam-  
797 pus* 26 (2) (2016) 246–260, ISSN 10509631, doi:10.1002/hipo.22519, URL  
798 <http://doi.wiley.com/10.1002/hipo.22519>.
- 799 L. Muessig, J. Hauser, T. J. Wills, F. Cacucci, A Developmental Switch in  
800 Place Cell Accuracy Coincides with Grid Cell Maturation, *Neuron* 86 (5)  
801 (2015) 1167–1173, ISSN 0896-6273, doi:10.1016/J.NEURON.2015.05.011.
- 802 J. Koenig, A. N. Linder, J. K. Leutgeb, S. Leutgeb, The Spatial Periodicity of  
803 Grid Cells Is Not Sustained During Reduced Theta Oscillations, *Science* (80-  
804 ). 332 (6029) (2011) 592–595, ISSN 0036-8075, doi:10.1126/science.1201685.
- 805 M. P. Brandon, J. Koenig, J. K. Leutgeb, S. Leutgeb, New and  
806 Distinct Hippocampal Place Codes Are Generated in a New  
807 Environment during Septal Inactivation, *Neuron* 82 (4) (2014)  
808 789–796, ISSN 08966273, doi:10.1016/j.neuron.2014.04.013, URL  
809 <https://linkinghub.elsevier.com/retrieve/pii/S0896627314003031>.
- 810 L. de Almeida, M. Idiart, J. E. Lisman, The Input-Output Transformation of  
811 the Hippocampal Granule Cells: From Grid Cells to Place Fields, *J. Neurosci.*  
812 29 (23) (2009a) 7504–7512, doi:10.1523/JNEUROSCI.6048-08.2009.
- 813 P. Byrne, S. Becker, N. Burgess, Remembering the past and imagining the  
814 future: A neural model of spatial memory and imagery, *Psychol. Rev.* 114 (2)  
815 (2007) 340–375.
- 816 A. Bicanski, N. Burgess, A neural-level model of spatial memory and imagery,  
817 *Elife* 7 (7052) (2018) e33752, ISSN 2050-084X, doi:10.7554/eLife.33752.

- 818 T. Iijima, M. P. Witter, M. Ichikawa, T. Tominaga, R. Kaji-  
819 wara, G. Matsumoto, Entorhinal-Hippocampal Interactions Re-  
820 vealed by Real-Time Imaging, *Science* (80-. ). 272 (5265) (1996)  
821 1176–1179, ISSN 0036-8075, doi:10.1126/science.272.5265.1176, URL  
822 <http://www.sciencemag.org/cgi/doi/10.1126/science.272.5265.1176>.
- 823 A. Guanella, D. Kiper, P. Vershure, A model of grid cells based on a twisted  
824 torus topology, *Int. J. Neural Syst.* 17 (04) (2007) 231–240, ISSN 0129-0657,  
825 doi:10.1142/S0129065707001093.
- 826 Y. Burak, I. R. Fiete, Accurate path integration in continuous attractor network  
827 models of grid cells., *PLoS Comput. Biol.* 5 (2) (2009) e1000291, ISSN 1553-  
828 7358, doi:10.1371/journal.pcbi.1000291.
- 829 E. Oja, Simplified neuron model as a principal component analyzer., *J. Math.*  
830 *Biol.* 15 (3) (1982) 267–273.
- 831 L. Slomianka, I. Amrein, I. Knuesel, J. C. Sørensen, D. P. Wolfer, Hippocampal  
832 pyramidal cells: the reemergence of cortical lamination, *Brain Struct. Funct.*  
833 216 (4) (2011) 301–317, ISSN 1863-2653, doi:10.1007/s00429-011-0322-0, URL  
834 <http://link.springer.com/10.1007/s00429-011-0322-0>.
- 835 L. de Almeida, M. Idiart, J. E. Lisman, A Second Function of Gamma Frequency  
836 Oscillations: An E%-Max Winner-Take-All Mechanism Selects Which Cells  
837 Fire, *J. Neurosci.* 29 (23) (2009b) 7497–7503, doi:10.1523/JNEUROSCI.6044-  
838 08.2009.
- 839 D. Aronov, D. W. Tank, Engagement of Neural Circuits Underlying 2D Spatial  
840 Navigation in a Rodent Virtual Reality System, *Neuron* 84 (2) (2014) 442–  
841 456, ISSN 0896-6273, doi:10.1016/J.NEURON.2014.08.042.
- 842 J. B. Hales, M. I. Schlesiger, J. K. Leutgeb, L. R. Squire, S. Leutgeb, R. E. Clark,  
843 Medial Entorhinal Cortex Lesions Only Partially Disrupt Hippocampal Place  
844 Cells and Hippocampus-Dependent Place Memory, *Cell Rep.* 9 (3) (2014)  
845 893–901, ISSN 2211-1247, doi:10.1016/J.CELREP.2014.10.009.

- 846 K. M. Gothard, W. E. Skaggs, B. L. McNaughton, Dynamics of mismatch cor-  
847 rection in the hippocampal ensemble code for space: Interaction between path  
848 integration and environmental cues, *J. Neurosci.* 16 (24) (1996) 8027–8040.
- 849 A. Samsonovich, B. L. McNaughton, Path integration and cognitive mapping  
850 in a continuous attractor neural network model, *J. Neurosci.* 17 (15) (1997)  
851 5900–5920.
- 852 W. E. Skaggs, B. L. McNaughton, Spatial Firing Properties of Hippocam-  
853 pal CA1 Populations in an Environment Containing Two Visually Identical  
854 Regions, *J. Neurosci.* 18 (20) (1998) 8455–8466, ISSN 0270-6474, doi:  
855 10.1523/JNEUROSCI.18-20-08455.1998.
- 856 V. H. Brun, M. K. Otnaess, S. Molden, H.-A. Steffenbach, M. P. Witter, M.-  
857 B. Moser, M. E. I., Place Cells and Place Recognition Maintained by Direct  
858 Entorhinal-Hippocampal Circuitry, *Science* (80-. ). 296 (5576) (2002) 2243–  
859 2246, ISSN 00368075, doi:10.1126/science.1071089.
- 860 P. A. Naber, F. H. Lopes da Silva, M. P. Witter, Reciprocal connections between  
861 the entorhinal cortex and hippocampal fields CA1 and the subiculum are in  
862 register with the projections from CA1 to the subiculum, *Hippocampus* 11 (2)  
863 (2001) 99–104, ISSN 1050-9631, doi:10.1002/hipo.1028.
- 864 F. Kloosterman, T. van Haeften, M. P. Witter, F. H. Lopes da Silva, Elec-  
865 trophysiological characterization of interlaminar entorhinal connections: an  
866 essential link for re-entrance in the hippocampal-entorhinal system, *Eur. J.*  
867 *Neurosci.* 18 (11) (2003) 3037–3052, ISSN 0953-816X, doi:10.1111/j.1460-  
868 9568.2003.03046.x.
- 869 K. Mizuseki, K. Diba, E. Pastalkova, G. Buzsáki, Hippocampal CA1 pyramidal  
870 cells form functionally distinct sublayers, *Nat. Neurosci.* 14 (9) (2011) 1174–  
871 1181, ISSN 1097-6256, doi:10.1038/nn.2894.
- 872 A. V. Masurkar, K. V. Srinivas, D. H. Brann, R. Warren, D. C. Lowes, S. A.  
873 Siegelbaum, Medial and Lateral Entorhinal Cortex Differentially Excite Deep



- 874 versus Superficial CA1 Pyramidal Neurons, *Cell Rep.* 18 (1) (2017) 148–160,  
875 ISSN 2211-1247, doi:10.1016/J.CELREP.2016.12.012.
- 876 D. Mao, S. Kandler, B. L. McNaughton, V. Bonin, Sparse orthogonal population  
877 representation of spatial context in the retrosplenial cortex, *Nat. Commun.*  
878 8 (1) (2017) 243, ISSN 2041-1723, doi:10.1038/s41467-017-00180-9.
- 879 W. E. Skaggs, B. L. McNaughton, Replay of neuronal firing sequences in rat  
880 hippocampus during sleep following spatial experience, *Science* (80-. ). 271  
881 (1996) 1870–1873.
- 882 G. Girardeau, K. Benchenane, S. I. Wiener, G. Buzsáki, M. B. Zugaro, Selective  
883 suppression of hippocampal ripples impairs spatial memory, *Nat. Neurosci.*  
884 12 (10) (2009) 1222–1223, ISSN 1546-1726, doi:10.1038/nn.2384.
- 885 K. Benchenane, A. Peyrache, M. Khamassi, P. L. Tierney, Y. Gioanni, F. P.  
886 Battaglia, S. I. Wiener, Coherent theta oscillations and reorganization of spike  
887 timing in the hippocampal-prefrontal network upon learning, *Neuron* 66 (6)  
888 (2010) 921–936, ISSN 08966273, doi:10.1016/j.neuron.2010.05.013, URL  
889 <http://linkinghub.elsevier.com/retrieve/pii/S0896627310003818>.
- 890 H. Tanila, Hippocampal place cells can develop distinct representations of two  
891 visually identical environments, *Hippocampus* 9 (3) (1999) 235–246, doi:  
892 10.1002/(SICI)1098-1063(1999)9:3<235::AID-HIPO4>3.0.CO;2-3.
- 893 M. C. Fuhs, S. R. VanRhoads, A. E. Casale, B. McNaughton, D. S. Touretzky,  
894 Influence of Path Integration Versus Environmental Orientation on Place  
895 Cell Remapping Between Visually Identical Environments, *J. Neurophysiol.*  
896 94 (4) (2005) 2603–2616, ISSN 0022-3077, doi:10.1152/jn.00132.2005, URL  
897 <http://www.physiology.org/doi/10.1152/jn.00132.2005>.
- 898 V. Paz-Villagrán, E. Save, B. Poucet, Spatial discrimination of vi-  
899 sually similar environments by hippocampal place cells in the pres-  
900 ence of remote recalibrating landmarks, *Eur. J. Neurosci.* 23 (1)

- 901 (2006) 187–195, ISSN 0953816X, doi:10.1111/j.1460-9568.2005.04541.x, URL  
902 <http://doi.wiley.com/10.1111/j.1460-9568.2005.04541.x>.
- 903 H. J. Spiers, R. M. A. Hayman, A. Jovalekic, E. Marozzi, K. J. Jeffery,  
904 Place Field Repetition and Purely Local Remapping in a Multicompart-  
905 ment Environment, *Cereb. Cortex* 25 (1) (2015) 10–25, ISSN 1047-3211, doi:  
906 10.1093/cercor/bht198.
- 907 R. M. Grieves, B. W. Jenkins, B. C. Harland, E. R. Wood, P. A. Dud-  
908 chenko, Place field repetition and spatial learning in a multicompartment  
909 environment, *Hippocampus* 26 (1) (2016) 118–134, ISSN 10509631, doi:  
910 10.1002/hipo.22496, URL <http://doi.wiley.com/10.1002/hipo.22496>.
- 911 P.-Y. Jacob, G. Casali, L. Spieser, H. Page, D. Overington, K. Jeffery, An  
912 independent, landmark-dominated head-direction signal in dysgranular ret-  
913 rosplenial cortex, *Nat. Neurosci.* 20 (2) (2017) 173–175, ISSN 1097-6256, doi:  
914 10.1038/nn.4465, URL <http://www.nature.com/articles/nn.4465>.
- 915 B. L. McNaughton, C. A. Barnes, J. L. Gerrard, K. Gothard, M. W. Jung, J. J.  
916 Knierim, H. Kudrimoti, Y. Qin, W. E. Skaggs, M. Suster, K. L. Weaver, De-  
917 ciphering the hippocampal polyglot: the hippocampus as a path integration  
918 system, *J. Exp. Biol.* 199 (Pt 1) (1996) 173–185, ISSN 0022-0949.
- 919 E. S. Rosenzweig, A. D. Redish, B. L. McNaughton, C. A. Barnes, Hippocampal  
920 map realignment and spatial learning., *Nat. Neurosci.* 6 (6) (2003) 609–15.

921 **Figures**

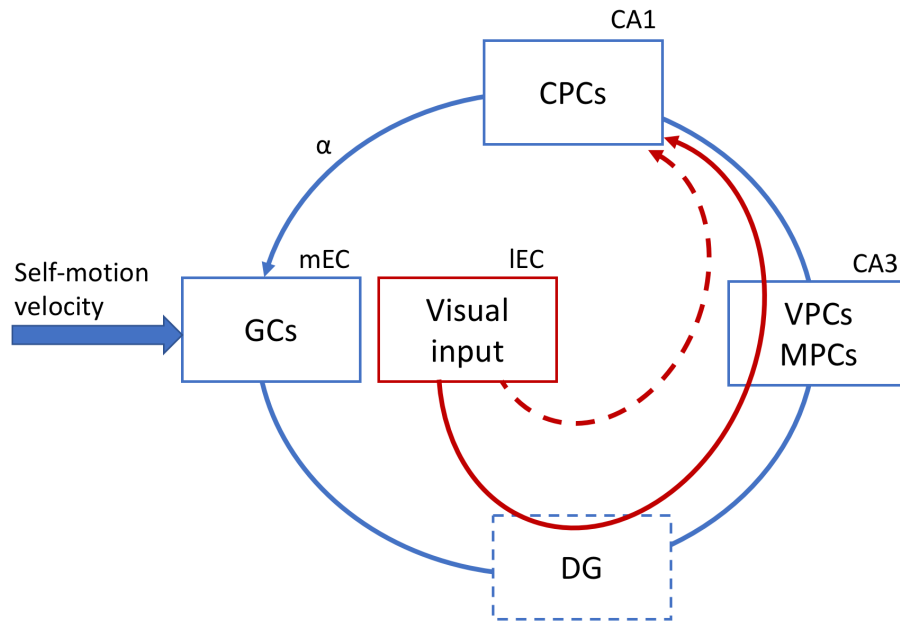

Figure 1: Schematic representation of the model. Self-motion input is integrated in the grid cell populations of the medial EC, and via competitive interactions results in a self-motion-driven space representation in CA3 (encoded by the MPC population). Visual input, coming via the IEC, results in a purely vision-based representation in CA3, encoded by the VPC population. Both MPCs and VPCs project to CA1 where the conjunctive representation of location is encoded in the CPC population. The projection from CPCs in CA1 back to the mEC closes the dynamic hippocampal processing loop and the strength of this projection is determined by the parameter  $\alpha$ . The full arrows represent the information flow in the network. The dashed arrow represents an alternative way to model visual input processing. The DG is not modeled.

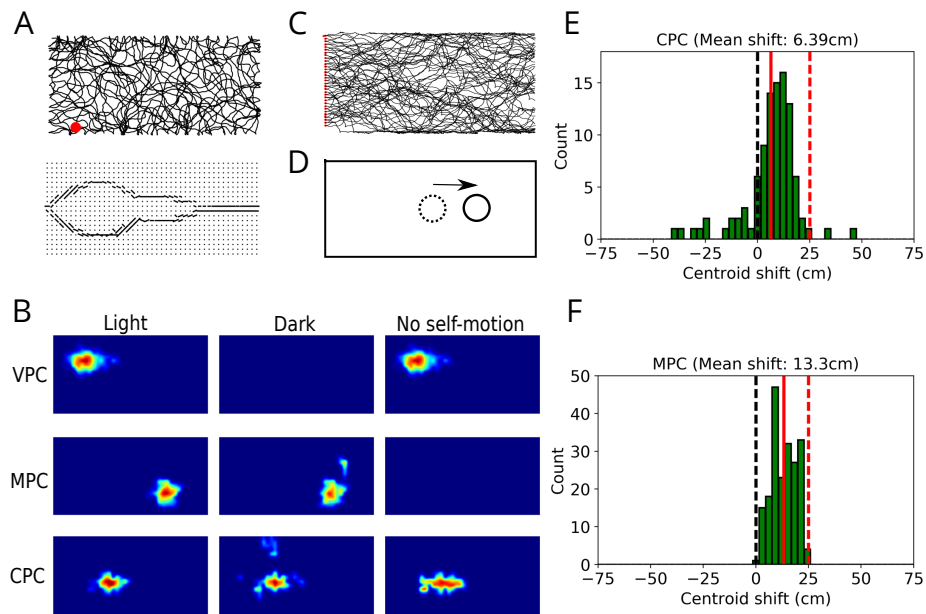

Figure 2: Multisensory integration in modeled place cells. A. An example of the trajectory of the modeled animal in a rectangular environment (top) and the visual input to the model (bottom) from the location marked by the red dot. In the bottom plot, the dots represent the grid of Gabor filters, and lines represent the orientations of most active filters. Visual input at each location is independent from head direction. B. Firing fields of VPCs (top row), MPCs (middle row) and CPCs (bottom row) in simulated 'light' condition (left column), 'dark' condition (middle column) and passive translation (right column). C. Trajectories of model animal crossing the rectangular environment from left to right. The red dots denote the starting positions. D. When the model rat crosses the environment from left to right, self-motion position estimate (dotted circle) is behind the visual position estimate (full circle) in the conditions of decreased speed gain, leading to a forward-shift of receptive fields. E,F. Forward-shift of receptive fields in the population of CPCs (top) and MPCs (bottom). Full red lines represent the mean shift in the population. Dashed red lines represent the shift due to purely self-motion input.

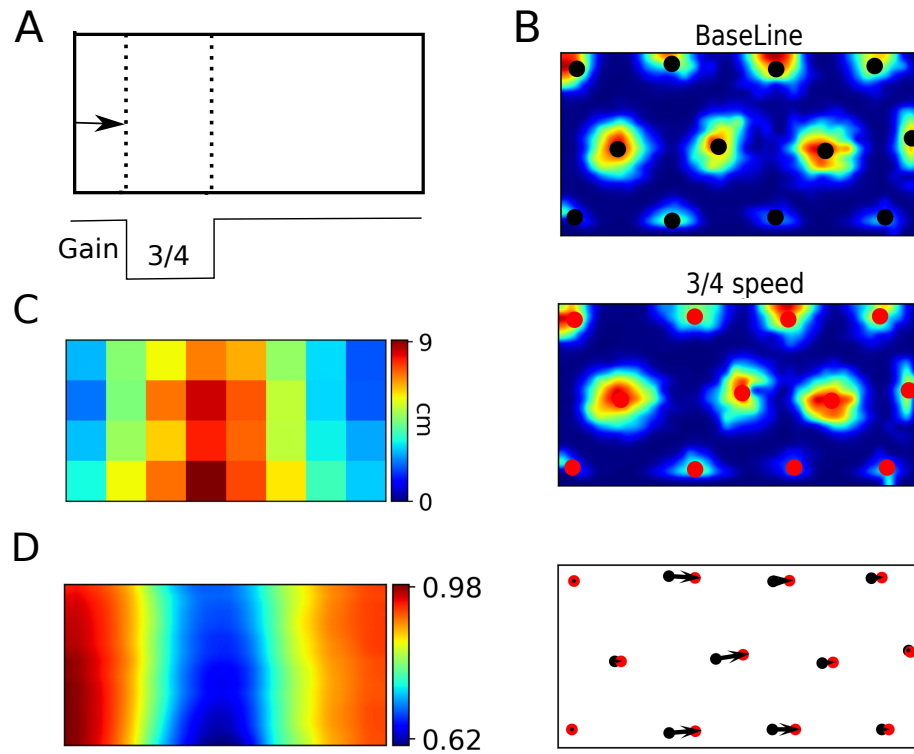

Figure 3: Multisensory integration in grid cells. A. The speed gain was transiently decreased to 3/4 of the normal gain when the model animal approached the portion of the environment marked by the dotted lines. B. An example of firing pattern of a grid cell in the conditions of normal speed (top) and with transiently decreased speed gain (middle). The black and red circles represent the centers of firing fields in the baseline condition and during decreased gain, respectively. The shift of firing fields is quantified by displacement vectors shown by the black arrows (bottom). C. Color map of the mean displacement vector lengths in different portions of the environment. D. Color map of mean sliding correlation over all grid cells.

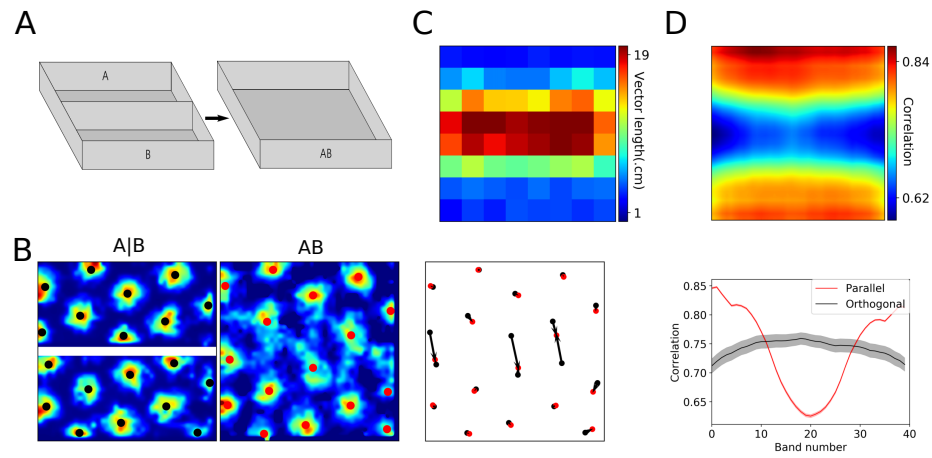

Figure 4: Simulation of the merged-room experiment of Wernle et al. (2018). A. The training environment with two separate rooms, referred to as room 'A|B', and the testing environment, referred to as merged room 'AB'. B. Firing fields of an example grid cell in the training (left) and testing (middle) environments, as well as firing-field displacement vectors calculated in the testing environment (right). C. A color map of mean vector lengths. D. Top plot: A color map representing the mean sliding correlation over all grid cells. Bottom plot: the correlation profiles at the center of the environment along two cardinal directions.

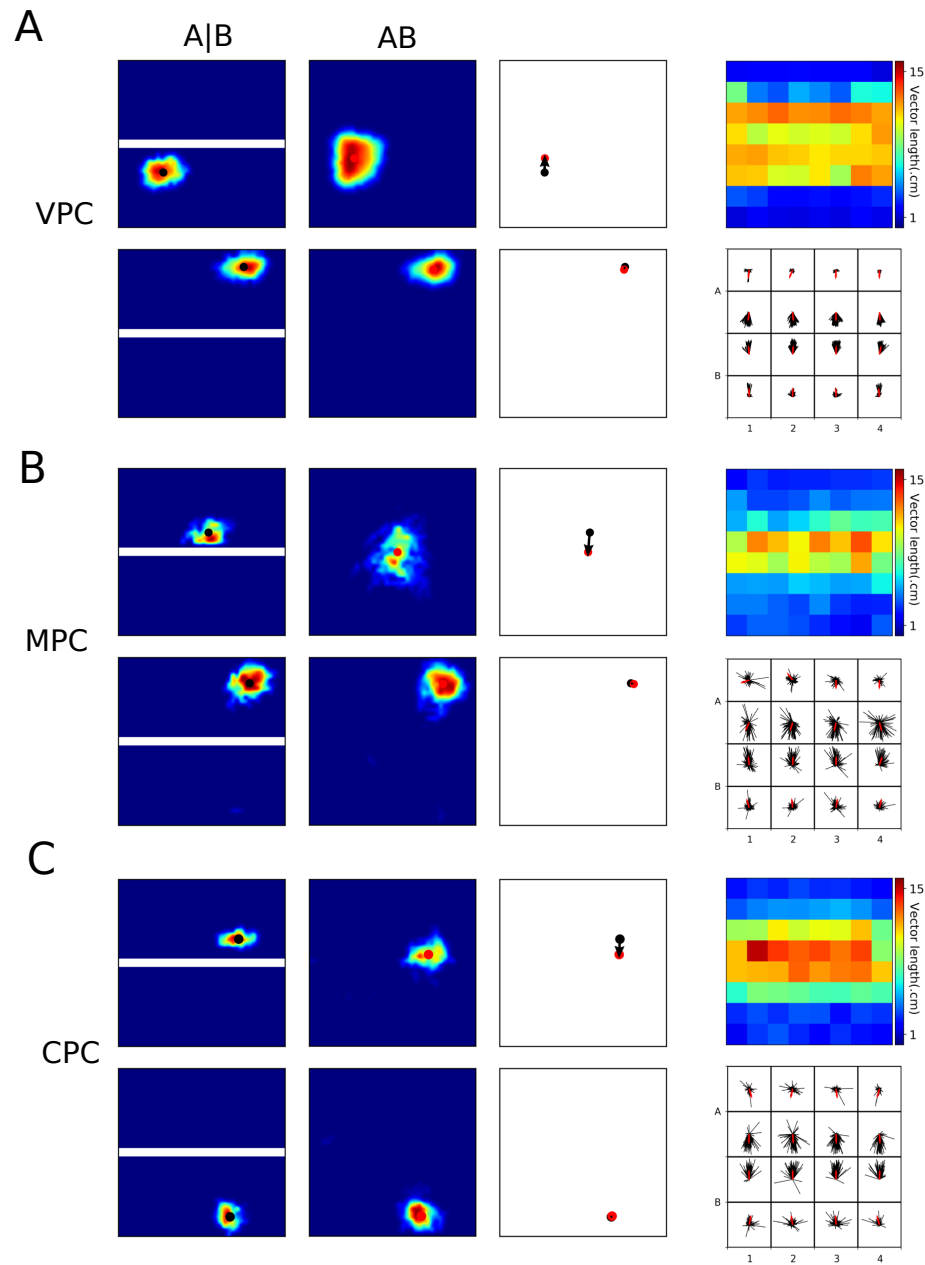

Figure 5: Place fields in the merged-room experiment. A. Left: receptive fields of two VPCs in the training and testing environments, either close to the removed wall (top) or distal from it (bottom). Middle: displacement vectors of the cells on the left. Right: color map of displacement vector lengths for all cells (top) and all displacement vectors with their mean direction shown in red (right). B,C. Receptive fields and displacement vectors for MPCs (B) and CPCs (C). Refer to A for details.

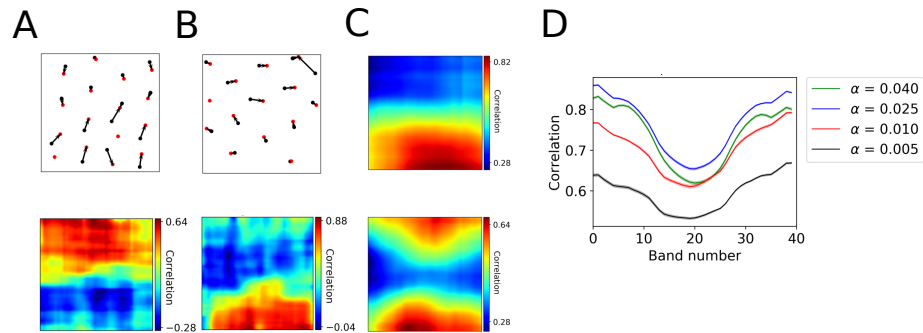

Figure 6: Influence of plasticity and dynamics on grid patterns in the merged-room experiment. A,B. Displacement vectors (top) and corresponding sliding correlation maps (bottom) of two example grid cells after learning in the merged room. C. Averaged over many grid cells, sliding correlation maps can result in different mean correlation patterns. D. Correlation profile for different values of the the strength  $\alpha$  of the hippocampal feedback loop.



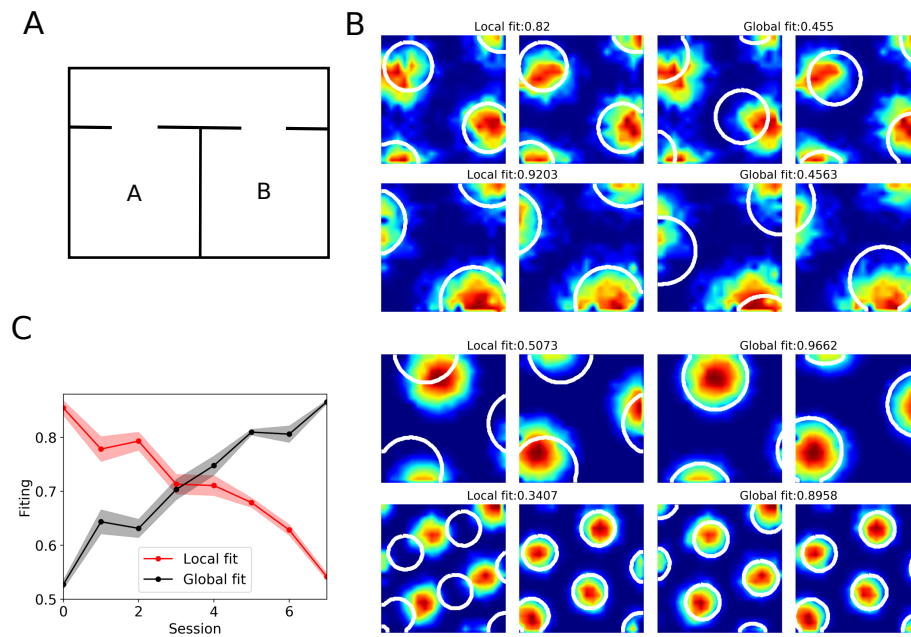

Figure 7: Simulation of the double-room experiment of Carpenter et al., 2015. A. Top view of the experimental environment. B. Local fit (left) versus global fit (right) during early (top) and late (bottom) sessions for two example grid cells (rows). C. Population estimates of the local fit (red) and global fit (black) as a function of session number (the value of  $\alpha$  decreased from 0.04 to 0.005 across sessions).

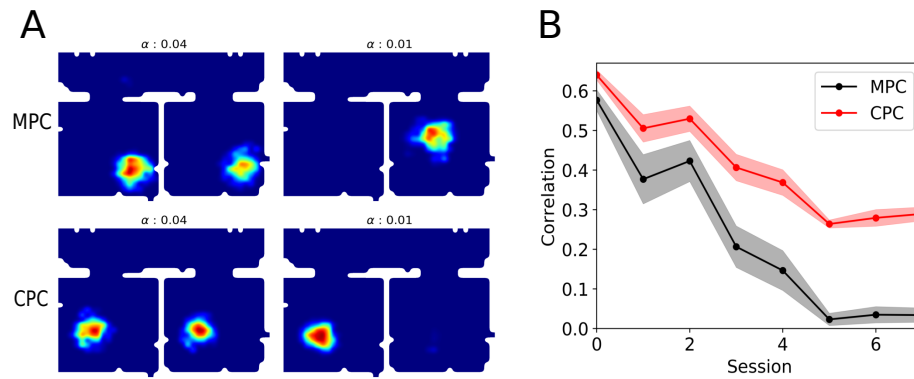

Figure 8: Evolution of place fields in the double room experiment. A. An example of MPC (top) and CPCs (bottom) place field during early learning sessions (left column, high  $\alpha$ ) and late sessions (right column, low  $\alpha$ ). In early sessions a majority of place cells have similar place fields in the two rooms, whereas in late sessions a majority of place cells have a place field only in one of the rooms. B. Spatial correlation between place fields of a cell in the two rooms, averaged over all place cells, as a function of session number (or, equivalently, as a function of decreasing value of  $\alpha$ ).

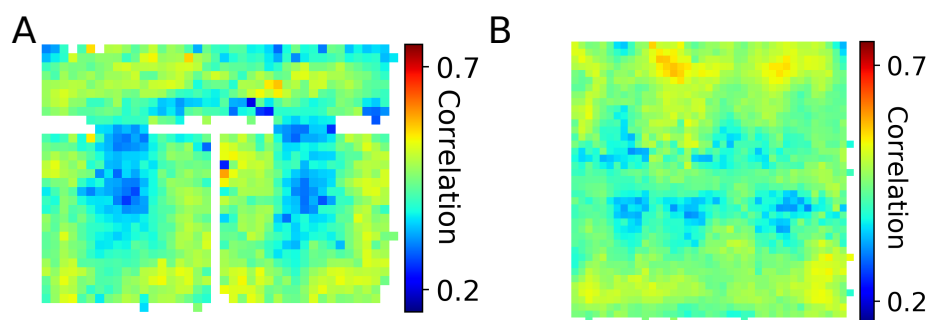

Figure 9: Mismatch between the visual and self-motion representations in the double-room (A) and merged-room (B) experiments. The colors denote the correlation between VPCs and MPCs projections onto the CPS population.
